# Supplementary material for: Fossil mammals from the Gondolin Dump A ex situ hominin deposits, South Africa
Source: PeerJ. 2018 Aug 6;6:e5393. doi: 10.7717/peerj.5393 (PMC6084286; doi:10.7717/peerj.5393)
Supplement: Supplemental Information 4 — Measurements for the GD A Antidorcas sp. and comparative modern and fossil specimens presented in Fig. 6C. Comparative data from Vrba (1976) and Harris (1991). [file peerj-06-5393-s004.xlsx]

## Sheet: AntilopinMeas
Locality and Deposit	Specimen Number	Taxon	Side	M3 Length	M3 Width
Gondolin GD A	242	Antidorcas sp.	Left	15.36	9.82
Gondolin GD A	253	Antidorcas sp.	Right	16.02	9.24
KNM	1455	Antidorcas recki		12.4	9
KNM	1455	Antidorcas recki		14.8	9.2
KNM	1640	Antidorcas recki		13.3	9.1
KNM	6018	Antidorcas recki		15.4	9.9
KNM	6087	Antidorcas recki		14.9	9.9
Kromdraai A	901	Antidorcas recki	Left	14.5	8
Kromdraai A	925	Antidorcas recki	Right	14.4	8.5
Kromdraai A	1157	Antidorcas bondi	Left	15	9
Kromdraai A	1639	Antidorcas recki	Left	14.2	8.4
Kromdraai A	1779	Antidorcas recki	Right	13.5
Kromdraai A	1779	Antidorcas recki	Left	13.8	7.7
Kromdraai A	2472	Antidorcas bondi	Right	14.2	9
Kromdraai A	1453d	Antidorcas recki	Left	15.5
Kromdraai A	881a	Antidorcas recki	Right	17	9.5
Swartkrans Member 1	2495	Gazella sp.?	Left	16.3	8.5
Swartkrans Member 1	2567	Antidorcas cf. recki	Right	15
Swartkrans Member 1	3012	Gazella sp.?	Left	17.2	10.2
Swartkrans Member 1	3012	Gazella sp.?	Right	18	11
Swartkrans Member 1	3033	Antidorcas cf. recki	Right	17.8
Swartkrans Member 1	3033	Antidorcas cf. recki	Left	19
Swartkrans Member 1	14063	Gazella sp.?	Left	16
Swartkrans Member 1	14063	Gazella sp.?	Right	16.1	11.8
Swartkrans Member 2	2730	Antidorcas australis/marsupialis	Left	13.7
Swartkrans Member 2	4022	Antidorcas australis/marsupialis	Right	14.5	9
Swartkrans Member 2	5418	Antidorcas australis/marsupialis	Right	17.8	10.9
Swartkrans Member 2	5427	Antidorcas australis/marsupialis	Right	17.3	11.1
Swartkrans Member 2	3055a	Antidorcas australis/marsupialis	Right	16.2	9.5
