# Supplementary material for: Fossil mammals from the Gondolin Dump A ex situ hominin deposits, South Africa
Source: PeerJ journal article supplement (doi:10.7717/peerj.5393), 2018-08-06
Supplement: Supplemental_Table_S1.pdf [file Supplemental_Table_S1.pdf]

Supplemental Table S1. Catalogue of the Gondolin GD A macromammalian craniodental specimens

| Taxon                          | Specimen         | Side | Description                                                                                                         |
|--------------------------------|------------------|------|---------------------------------------------------------------------------------------------------------------------|
| Primates                       |                  |      |                                                                                                                     |
| Hominini                       |                  |      |                                                                                                                     |
| <i>Paranthropus robustus</i>   | GA 2             | L    | Isolated complete m2 with crown and roots                                                                           |
| Hominini indet.                | GA 1             | L    | Isolated m1 or m2 fragment                                                                                          |
| Primate indet.                 | GA 165<br>GA 198 |      | Indeterminate maxillary molar lingual tooth root<br>Indeterminate molar tooth root possibly from a mandibular molar |
| Cetartiodactyla                |                  |      |                                                                                                                     |
| Bovidae                        |                  |      |                                                                                                                     |
| Alcelaphini                    |                  |      |                                                                                                                     |
| Medium sized<br>(Class II-III) | GA 31            |      | Isolated complete upper molar central cavity                                                                        |
|                                | GA 32            | R    | Lingual enamel surface of a m3 with light occlusal wear                                                             |
|                                | GA 34            |      | Partial upper molar crown with no occlusal surface or roots preserved                                               |
|                                | GA 35            | L    | Mandible portion with a near complete lower molar (m2?)                                                             |
|                                | GA 38            | R    | Complete p4 with heavy occlusal wear                                                                                |
|                                | GA 41            | R    | Mandible fragment with a partial p4 and complete m1-m3 with moderate occlusal wear                                  |
|                                | GA 42            | R    | Complete indeterminate lower premolar with moderate occlusal wear                                                   |
|                                | GA 43            | L    | Near complete M3 with damage to the lingual enamel surfaces and light/moderate occlusal wear                        |
|                                | GA 44            | R    | Complete unworn m3 with light enamel damage                                                                         |
|                                | GA 46            | L    | Complete m3 with moderate occlusal wear                                                                             |
|                                | GA 75            | L    | Complete indeterminate lower molar crown (m1 or m2) with moderate occlusal wear                                     |
|                                | GA 76            | R    | Mostly complete lower molar (m1 or m2) with moderate occlusal wear                                                  |
|                                | GA 78            |      | Isolated lower molar crown (m1 or m2) with moderate occlusal wear                                                   |
|                                | GA 79            |      | Isolated lower molar crown (m1 or m2) with damage to the occlusal surface                                           |

| Taxon              | Specimen | Side | Description                                                                           |
|--------------------|----------|------|---------------------------------------------------------------------------------------|
| Medium sized cont. | GA 80    | R    | Isolated lower molar crown (m1?) with moderate/heavy occlusal wear                    |
|                    | GA 81    | L    | Near complete lower molar crown (m1 or m2) with moderate occlusal wear                |
|                    | GA 83    | L    | Near complete m3 with damage to the mesial aspect and moderate occlusal wear          |
|                    | GA 95    | R    | Complete M2 crown with moderate occlusal wear                                         |
|                    | GA 146   | R    | Near complete lower molar crown (m1 or m2) with light/moderate occlusal wear          |
|                    | GA 149   | R    | Near complete m3 with moderate occlusal wear                                          |
|                    | GA 151   |      | Portion of an indeterminate upper molar                                               |
|                    | GA 190   | R    | Near complete lower molar (m1?) with heavy occlusal wear                              |
|                    | GA 191   |      | Isolated indeterminate lower molar central cavity                                     |
|                    | GA 208   |      | Near complete occlusal surface for an indeterminate lower molar (m1 or m2)            |
|                    | GA 227   | R    | Mandible portion with an indeterminate lower molar (m1?) with moderate occlusal wear  |
|                    | GA 229   | R    | Complete P3 crown with moderate occlusal wear                                         |
|                    | GA 230   |      | Near complete lower molar (m1?) with light occlusal wear                              |
|                    | GA 233   |      | Partial indeterminate lower molar occlusal surface and lacking most of the crown      |
|                    | GA 239   | R    | Near complete upper molar crown with moderate occlusal wear                           |
|                    | GA 241   | L    | Near complete upper molar crown with light/moderate occlusal wear                     |
|                    | GA 244   | L    | Near complete M3 with moderate occlusal wear                                          |
|                    | GA 254   | L    | Near complete upper molar crown with moderate occlusal wear                           |
|                    | GA 255   | R    | Partial indeterminate upper molar with light/moderate occlusal wear                   |
|                    | GA 260   |      | Central cavity from an indeterminate upper molar (m2?) with moderate occlusal wear    |
|                    | GA 261   | R    | Near complete indeterminate lower molar (m1 or m2) with moderate occlusal wear        |
|                    | GA 262   |      | Partial indeterminate lower molar occlusal surface                                    |
|                    | GA 263   | R    | Near complete P4 crown with light occlusal wear                                       |
|                    | GA 264   | R    | Near complete upper molar with moderate occlusal wear                                 |
|                    | GA 266   | R    | Near complete upper premolar (P3?) crown with moderate occlusal wear                  |
|                    | GA 290   | R    | Complete m3 crown with moderate occlusal wear                                         |
|                    | GA 293   | L    | Near complete lower molar (m1 or m2) with moderate occlusal wear (assoc. with GA 290) |
|                    | GA 841   |      | Portion of an indeterminate upper molar central cavity                                |
|                    | GA 842   | R    | Partial upper premolar crown and root with moderate occlusal wear                     |

| Taxon              | Specimen | Side | Description                                                                          |
|--------------------|----------|------|--------------------------------------------------------------------------------------|
| Medium sized cont. | GA 843   | R    | Complete m3 crown with moderate/heavy occlusal wear                                  |
|                    | GA 844   | L    | Partial upper molar crown lacking the occlusal surface                               |
|                    | GA 856   | R    | Near complete M3 crown with moderate occlusal wear                                   |
|                    | GA 858   | R    | Near complete indeterminate upper molar (m1 or m2) with light/moderate occlusal wear |
|                    | GA 859   |      | Small portion of an indeterminate upper molar lingual enamel surface                 |
|                    | GA 880   |      | Partial indeterminate lower molar crown                                              |
|                    | GA 1371  | L    | Complete m3 crown with heavy occlusal wear                                           |
|                    | GA 1380  | L    | Partial crown from an indeterminate lower molar                                      |
|                    | GA 1382  | L    | Partial crown from an indeterminate upper premolar lacking the occlusal surface      |
|                    | GA 1383  | R    | Poorly preserved upper molar (M3?) without the occlusal surface                      |
|                    | GA 1408  |      | Partial upper molar central cavity                                                   |
|                    | GA 1411  |      | Partial lower molar central cavity                                                   |
|                    | GA 1412  |      | Partial upper molar central cavity                                                   |
|                    | GA 1413  |      | Complete upper molar central cavity                                                  |
|                    | GA 1415  |      | Complete lower molar central cavity                                                  |
|                    | GA 1416  |      | Isolated indeterminate central cavity                                                |
|                    | GA 1417  |      | Complete upper molar central cavity                                                  |
|                    | GA 1418  |      | Complete lower molar central cavity                                                  |
|                    | GA 1419  |      | Complete upper molar central cavity                                                  |
|                    | GA 1420  |      | Complete lower molar central cavity                                                  |
|                    | GA 1421  |      | Complete lower molar central cavity                                                  |
|                    | GA 1454  | R    | Partial m3 crown with moderate occlusal wear                                         |
|                    | GA 1499  |      | Small portion of the unworn crown of an indeterminate lower molar                    |
|                    | GA 1726  | R    | Complete m3 crown with moderate/heavy occlusal wear                                  |
|                    | GA 1951  | R    | Near complete lower molar crown (m1 or m2) with light occlusal wear                  |
|                    | GA 1964  | L    | Complete p4 with light occlusal wear                                                 |
|                    | GA 1976  |      | Partial indeterminate lower molar (m1 or m2) with moderate occlusal wear             |
|                    | GA 2003  | R    | Mandible portion with roots of the p2, p3 deciduous p4 and a partial m1 crown        |
|                    | GA 2004  | L    | Complete deciduous p4 crown with near complete roots and moderate occlusal wear      |
|                    | GA 2029  | R    | Partial mandible with a partial deciduous p4 with moderate occlusal wear             |

| Taxon                      | Specimen | Side                                          | Description                                                                             |
|----------------------------|----------|-----------------------------------------------|-----------------------------------------------------------------------------------------|
| Medium sized cont.         | GA 2100  | R                                             | Partial P3 with moderate occlusal wear                                                  |
|                            | GA 2165  | R                                             | Partial mandibular ramus with a near complete deciduous p4 with moderate occlusal wear  |
| Large sized<br>(Class III) | GA 91    | L                                             | Near complete p4 crown and roots                                                        |
|                            | GA 243   | L                                             | Complete P4 crown with moderate/heavy occlusal wear and part of the lingual root        |
|                            | GA 337   | L                                             | Near complete unworn P4 crown with light damage to the crown                            |
|                            | GA 1489  | L                                             | Complete M3 crown and roots with moderate occlusal wear                                 |
|                            | GA 1568  | L                                             | Complete lower molar (m1 or m2) with moderate occlusal wear                             |
|                            | GA 1942  | R                                             | Complete upper molar (M3?) crown with damage to the occlusal surface                    |
|                            |          |                                               |                                                                                         |
| Antilopini                 |          |                                               |                                                                                         |
| <i>Antidorcas</i> sp.      | GA 36    | R                                             | Partial crown of an upper molar (M2?) with light occlusal wear                          |
|                            | GA 242   | L                                             | Complete M3 crown with a lightly worn and damaged occlusal surface                      |
|                            | GA 248   | L                                             | Near complete upper molar (M3?) with light occlusal wear                                |
|                            | GA 251   | R                                             | Complete m2 crown with moderate occlusal wear                                           |
|                            | GA 253   | R                                             | Complete M3 crown with light occlusal wear                                              |
| Hippotragini               |          |                                               |                                                                                         |
| <i>Hippotragus equinus</i> |          | L                                             |                                                                                         |
|                            | GA 2161  |                                               | Near complete unworn P4 crown                                                           |
|                            | GA 2173  | R                                             | Complete p2 with light/moderate occlusal wear                                           |
|                            | GA 2174  | L                                             | Partial paraconid from a lower premolar (p3?) associated with GA 2161, 2173 and 2175    |
| GA 2175                    | L        | Complete p3 crown with moderate occlusal wear |                                                                                         |
| Oreotragini                |          |                                               |                                                                                         |
| <i>Oreotragus</i> sp.      | GA 209   | L                                             | Maxilla portion with P2, P3 (possible deciduous), deciduous P4, M1 and M2 (in eruption) |
|                            | GA 234   | L                                             | Complete M1 crown with extremely heavy occlusal wear                                    |
|                            | GA 1960  | L                                             | Partial P2 crown with moderate occlusal wear                                            |
|                            | GA 2035  | L                                             | Mandible portion complete p3-m1 and the alveolus for the m2                             |

| Taxon                           | Specimen | Side | Description                                                                                |
|---------------------------------|----------|------|--------------------------------------------------------------------------------------------|
| Reduncini                       |          |      |                                                                                            |
| <i>Redunca</i> sp.              | GA 8     | L    | Complete unworn P2 crown and roots                                                         |
|                                 | GA 20    | R    | Partial mandible with a partial m1, complete m2 and partial m3 with moderate occlusal wear |
|                                 | GA 21    | L    | Partial mandible with complete m1-m3 with superficial occlusal wear to the m3              |
|                                 | GA 45    | R    | Complete unworn p2 crown                                                                   |
|                                 | GA 147   | L    | Partial mandible with complete m1-m3 with superficial occlusal wear to the m3              |
|                                 | GA 170   | R    | Complete P3 crown in moderate occlusal wear                                                |
|                                 | GA 175   | L    | Nearly complete M1 with damage to the lingual enamel surfaces                              |
|                                 | GA 236   | R    | Complete P3 crown with light/moderate occlusal wear                                        |
|                                 | GA 237   | R    | Complete P3 crown and roots with very superficial occlusal wear                            |
|                                 | GA 252   | R    | Complete M3 crown with light occlusal wear                                                 |
|                                 | GA 311   | R    | Complete P4 crown with partial roots and moderate occlusal wear                            |
|                                 | GA 312   | L    | Complete P4 crown with heavy occlusal wear                                                 |
|                                 | GA 313   | R    | Complete P4 crown with moderate occlusal wear                                              |
|                                 | GA 868   | R    | Isolated partial lower molar with light occlusal wear                                      |
|                                 | GA 1028  | L    | Near complete deciduous P3 crown with superficial occlusal wear                            |
|                                 | GA 2096  | L    | Partial lower molar (m1?) with damage to the lingual enamel surfaces                       |
| Tragelaphini                    |          |      |                                                                                            |
| <i>Tragelaphus oryx</i>         | GA 9     | R    | Isolated p2 crown without occlusal wear or roots                                           |
|                                 | GA 39    | R    | Damaged lower molar with near complete roots and moderate occlusal wear                    |
|                                 | GA 1029  | R    | Isolated nearly complete M3 with moderate/heavy occlusal wear and partial roots            |
| <i>Tragelaphus strepsiceros</i> | GA 294   | L    | Small portion of the mandibular ramus with the deciduous p4 and part of the m1 preserved   |
| Tragelaphini indet.             | GA 13    | R    | Distal portion of a heavily worn indeterminate lower molar with a partial root             |
|                                 | GA 238   | L    | Near complete upper molar crown with light/moderate occlusal wear                          |
|                                 | GA 245   | L    | Mandible fragment with a partial m2 and m3 with moderate occlusal wear                     |

| Taxon                            | Specimen | Side | Description                                                                                                                                                      |
|----------------------------------|----------|------|------------------------------------------------------------------------------------------------------------------------------------------------------------------|
| Tragelaphini indet.<br>continued | GA 247   | R    | Probable mandible fragment with small parts of two molars with moderate occlusal wear<br>Partial cusp and central cavity of an upper molar                       |
|                                  | GA 314   |      |                                                                                                                                                                  |
|                                  | GA 348   | L    | Partial isolated upper molar                                                                                                                                     |
|                                  | GA 846   | R    | Near complete m3 with light occlusal wear and a small portion of the root adhering                                                                               |
|                                  | GA 1369  |      | Isolated lower molar cusp with part of a central cavity and light occlusal wear                                                                                  |
|                                  | GA 1488  | R    | Near complete m3 crown with part of the mesial root and moderate/heavy occlusal wear                                                                             |
|                                  | GA 2102  |      | Small portion of a buccal cusp of an indeterminate lower molar                                                                                                   |
| Giraffidae<br><i>Giraffa</i> sp. | GA 308   | L    | Isolated nearly complete deciduous P3 with light occlusal wear and damage to the distal aspect                                                                   |
| Suidae<br>Suidae indet.          | GA 164   |      | Small, heavily worn occlusal surface with an isolated thick enamel 'island' and thick cementum                                                                   |
|                                  | GA 2123  |      | Isolated unworn terminal pillar with thick enamel                                                                                                                |
|                                  | GA 2141  |      | Isolated portion of a occluded terminal pillar with thick enamel                                                                                                 |
|                                  | GA 2156  |      | Isolated enamel fragment                                                                                                                                         |
| Carnivora<br>Felidae indet.      | GA 318   | R    | Isolated buccal portion of P4 with the paraconid root (possibly associated with GA 319)<br>Isolated portion of a P3 possibly associated with the GA 318 specimen |
|                                  | GA 319   | R    |                                                                                                                                                                  |
| Herpestidae indet.               | GA 1482  | R    | Isolated near complete p4 with some damage to the cusps                                                                                                          |
|                                  | GA 1483  | L    | Mandible portion with parts of the p4 and m1 preserved                                                                                                           |
|                                  | GA 1484  | R    | Near complete mandible with portions of the p2, p3 and m1 preserved                                                                                              |
| Carnivore indet.                 | GA 2121  |      | Indeterminate (possible felid) premolar fragment with occlusal wear                                                                                              |
|                                  | GA 2129  |      | Isolated canine crown from medium sized carnivore                                                                                                                |

| Taxon                   | Specimen | Side | Description                                                                                  |
|-------------------------|----------|------|----------------------------------------------------------------------------------------------|
| Perissodactyla          |          |      |                                                                                              |
| Equidae                 |          |      |                                                                                              |
| <i>Equus capensis</i>   | GA 93    | L    | Nearly complete deciduous P2 with heavy occlusal wear and resorbed roots                     |
|                         | GA 307   | L    | Lingual aspect of an indeterminate upper premolar or molar in wear                           |
|                         | GA 2169  | R    | Isolated complete crown of an indeterminate upper premolar or molar in moderate wear         |
|                         | GA 2026  | R    | Near complete unworn deciduous upper premolar crown                                          |
| <i>Equus</i> sp.        | GA 92    | R    | Portion of the buccal aspects of a p2 without roots                                          |
|                         | GA 156   | L    | Mandible fragment with portions of two extremely occluded premolars/molars (m1/m2?)          |
|                         | GA 303   | R    | Complete isolated i1 with moderate occlusal and interstitial wear                            |
|                         | GA 309   |      | Isolated upper incisor root (possibly from a right I2)                                       |
|                         | GA 1780  | R    | Isolated crown of an i1 or i2 without root and heavy interstitial wear on the mesial surface |
|                         | GA 1858  | L    | Isolated buccal aspect of the mesial occlusal surface from a lower premolar or molar         |
|                         | GA 2126  |      | Small portion of the central cavity of an indeterminate upper premolar or molar              |
| Hyracoidea              |          |      |                                                                                              |
| Procaviidae             |          |      |                                                                                              |
| <i>Procavia</i> sp.     | GA 1342  | R    | Complete upper i1 with morphology consistent with a female                                   |
|                         | GA 1943  | R    | Complete unworn crown of a lower permanent p2 or deciduous p2 without roots                  |
|                         | GA 1990  | R    | Poorly preserved P3 or P4 with heavy occlusal wear                                           |
|                         | GA 2160  | L    | Near complete crown and root of an i2                                                        |
| Rodentia                |          |      |                                                                                              |
| <i>Hystrix</i>          |          |      |                                                                                              |
| <i>africaeaustralis</i> | GA 6     | L    | Complete crown of an indeterminate upper molar with light occlusal wear                      |
| <i>Hystrix</i>          |          |      |                                                                                              |
| <i>makapanensis</i>     | GA 7     | L    | Isolated p4 with moderate occlusal wear (possibly from the same individual as GA 50)         |
|                         | GA 11    | R    | Isolated complete M1 with a moderately worn occlusal surface                                 |
|                         | GA 50    | L    | Complete M2 or M3 crown with moderate occlusal wear                                          |

| Taxon                             | Specimen | Side | Description                                                                                       |
|-----------------------------------|----------|------|---------------------------------------------------------------------------------------------------|
| <i>Hystrix makapanensis</i> cont. | GA 839   | L    | Portion of the mandibular ramus with a near complete p4                                           |
| Hystricidae indet.                | GA 12    |      | Partial occlusal surface of an indeterminate premolar or molar (possibly <i>H. makapanensis</i> ) |
|                                   | GA 77    |      | Portion of alveolus and incisor enamel of a probable right upper incisor                          |
|                                   | GA 320   |      | Isolated small portion of an indeterminate incisor                                                |
|                                   | GA 1915  |      | Isolated small portion of an indeterminate incisor                                                |
| Lagomorpha<br>Leporidae indet.    | GA 2189  | L    | Small mandibular ramus portion with a complete p4 and roots for the m1                            |
